# Supplementary material for: Trimodal hierarchical porous carbon nanorods enable high-performance Na–Se batteries
Source: Royal Society of Chemistry journal article supplement (doi:10.1039/d2sc04648b), 2022-01-01
Supplement: d2sc04648b1.pdf [file d2sc04648b1.pdf]

## Supporting Information

### **Trimodal hierarchical porous carbon nanorods enable high-performance Na-Se batteries**

Xiang Long Huang,<sup>1</sup> Xiaofeng Zhang,<sup>1</sup> Mingjie Yi,<sup>5</sup> Ye Wang,<sup>1</sup> Shaohui Zhang,<sup>3</sup> Shaokun Chong,<sup>4</sup>  
Hua Kun Liu,<sup>2</sup> Shi Xue Dou,<sup>2\*</sup> Zhiming Wang<sup>1,6\*</sup>

<sup>1</sup> Institute of Fundamental and Frontier Sciences, University of Electronic Science and Technology of China, 610054, P. R. China

E-mail: [zhmwang@uestc.edu.cn](mailto:zhmwang@uestc.edu.cn)

<sup>2</sup> Institute for Superconducting and Electronic Materials, University of Wollongong, North Wollongong, 2500, Australia

E-mail: [shi@uow.edu.au](mailto:shi@uow.edu.au)

<sup>3</sup> Guangdong Provincial Key Laboratory of Micro/Nano Optomechatronic Engineering, College of Mechatronics and Control Engineering, Shenzhen University, Shenzhen 518060, P. R. China

<sup>4</sup>Frontiers Science Center for Flexible Electronics, Xi'an Institute of Flexible Electronics and Xi'an Institute of Biomedical Materials & Engineering, Northwestern Polytechnical University, Xi'an 710072, P. R. China

<sup>5</sup> State Key Laboratory of Advanced Welding and Joining, Harbin Institute of Technology, Shenzhen 518055, China.

<sup>6</sup> Institute for Advanced Study, Chengdu University, Chengdu 610106, P. R. China

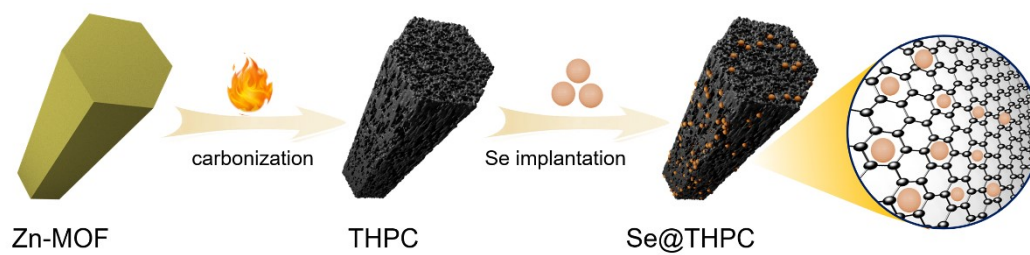

**Figure S1.** Schematic illustration of synthesis of the Se@THPC composite.

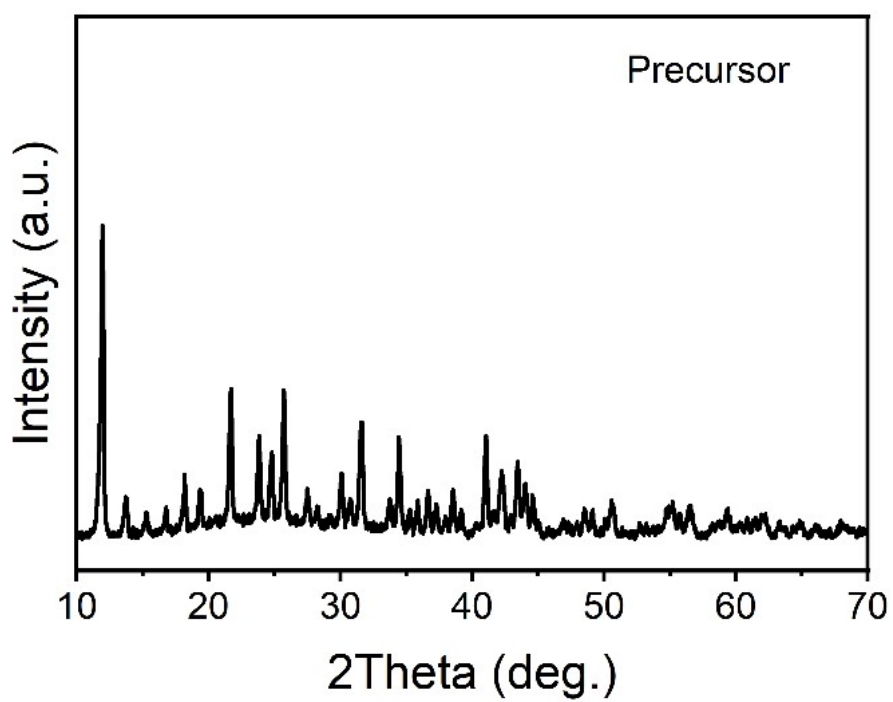

**Figure S2.** XRD Patterns of the Zn-MOF precursor.

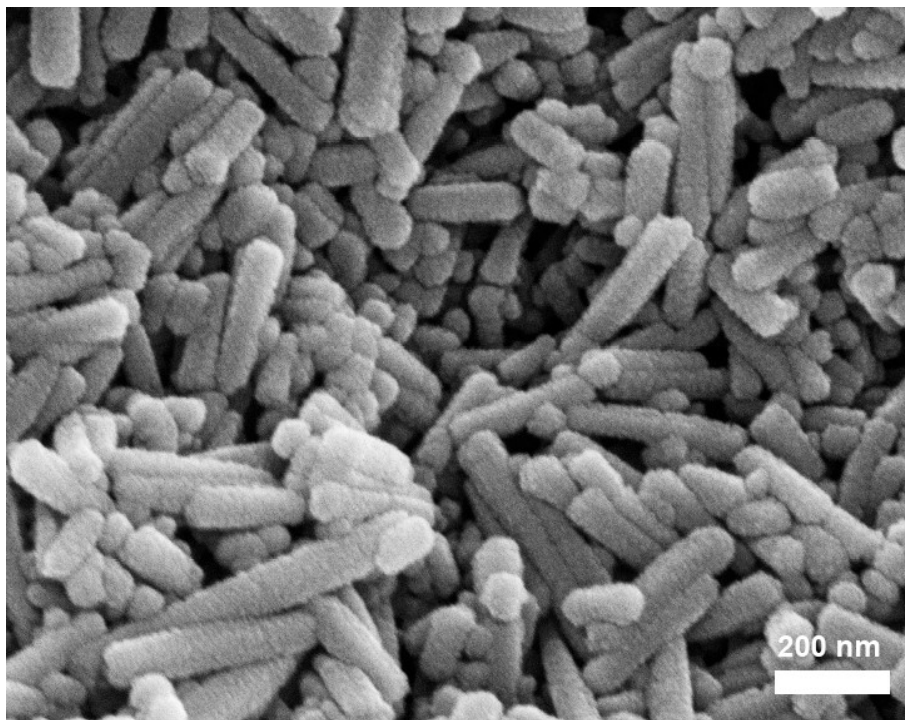

**Figure S3.** FESEM image of the Zn-MOF precursor.

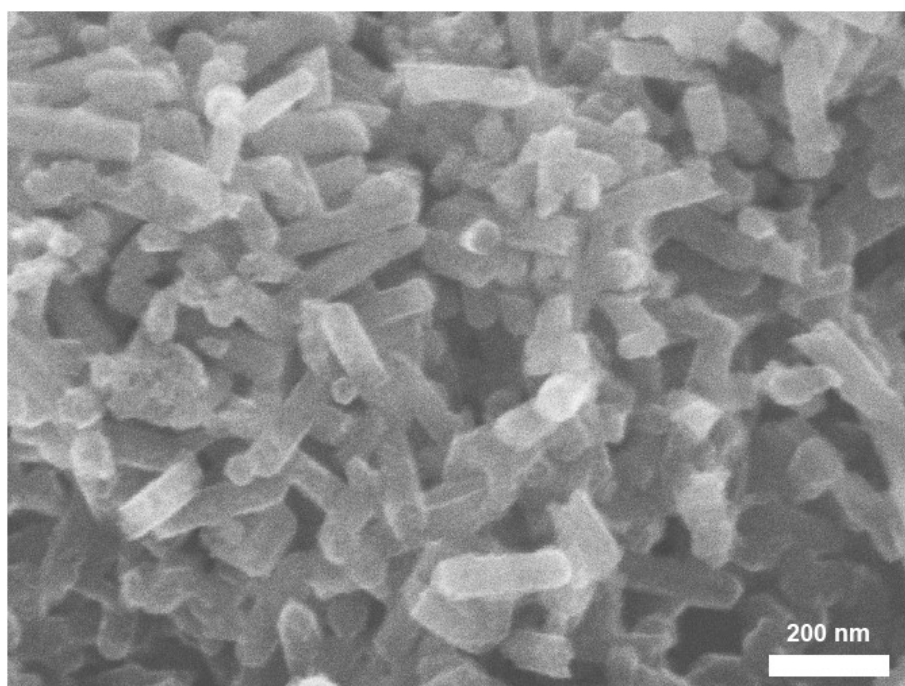

**Figure S4.** FESEM image of the THPC.

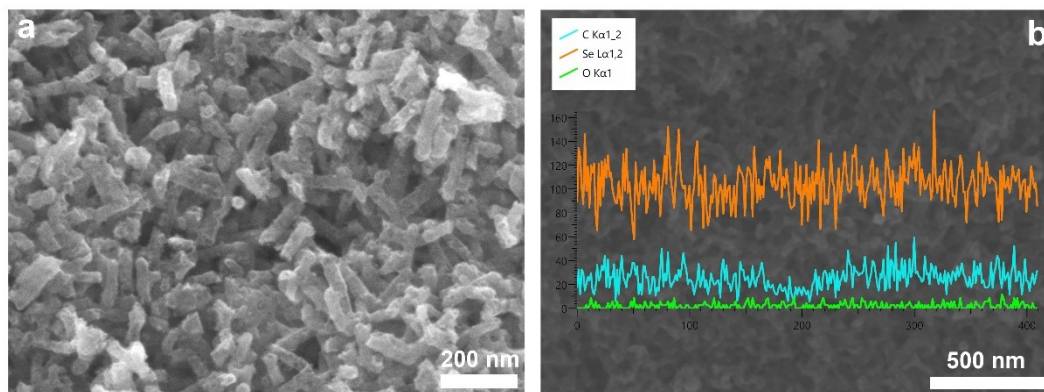

**Figure S5.** (a) FESEM image and linear scan (b) of the Se@THPC composite.

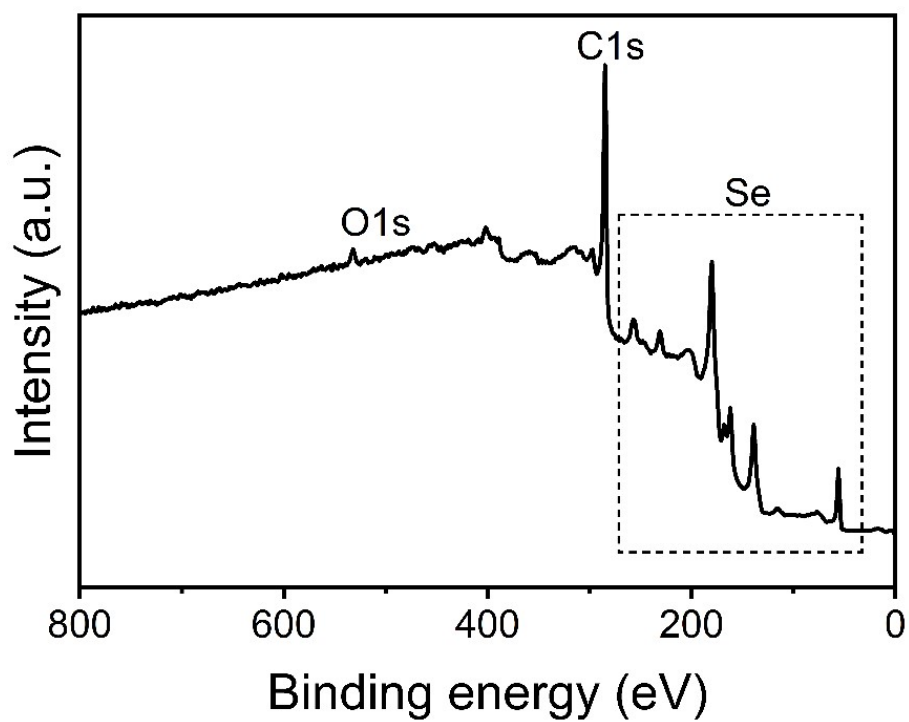

**Figure 6.** XPS spectra of the Se@THPC composite.

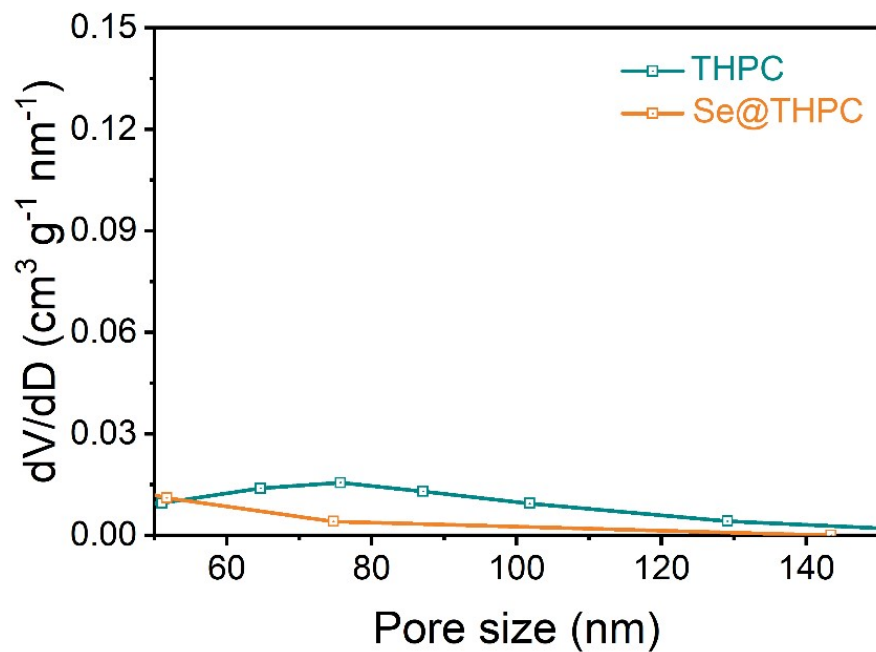

Figure S7. Pore distribution of the THPC and Se@THPC composite at a range from 50 to 150 nm.

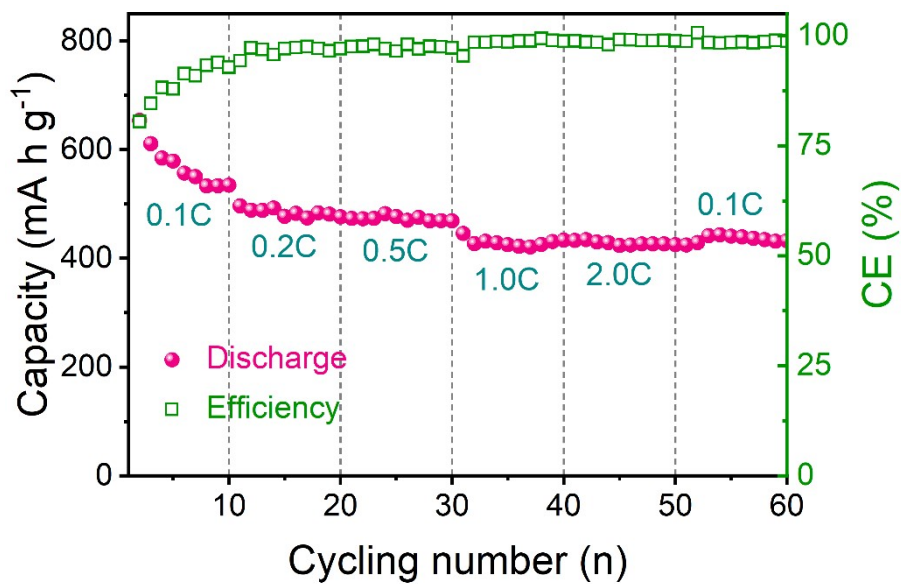

Figure S8. Rate performance of the Se@THPC composite at various rates.

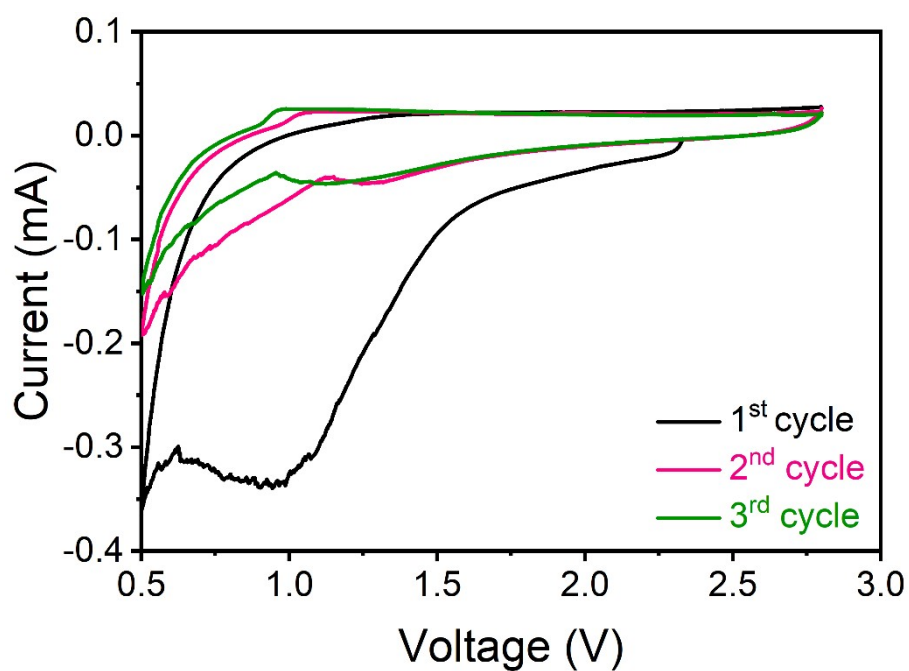

Figure S9. CV curves of the THPC at 0.1 mV s<sup>-1</sup>.

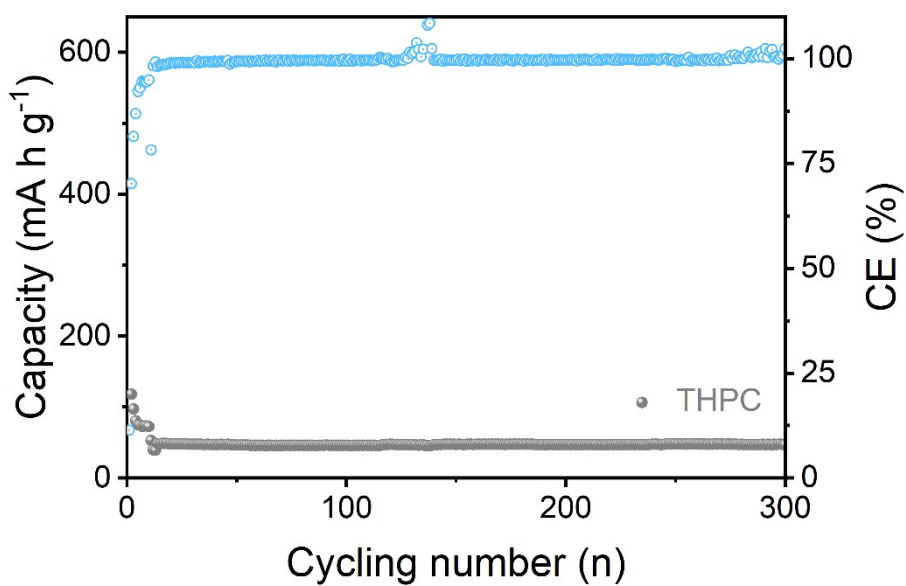

Figure S10. Cycling performance of the THPC at 675 mA g<sup>-1</sup>.

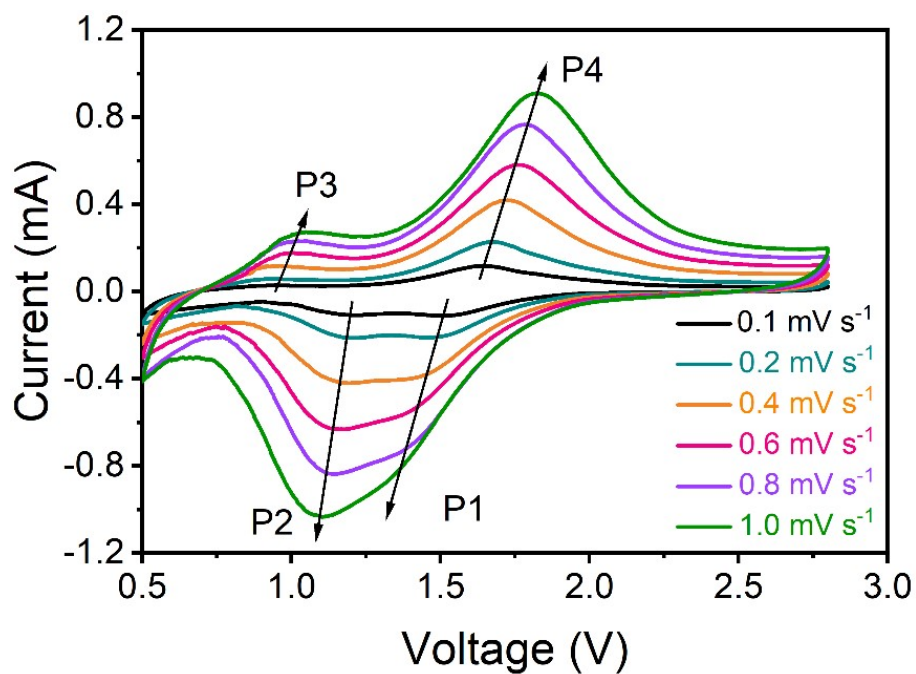

**Figure S11.** CV curves at a various scan rate from 0.1 to 1.0 mV s<sup>-1</sup>.

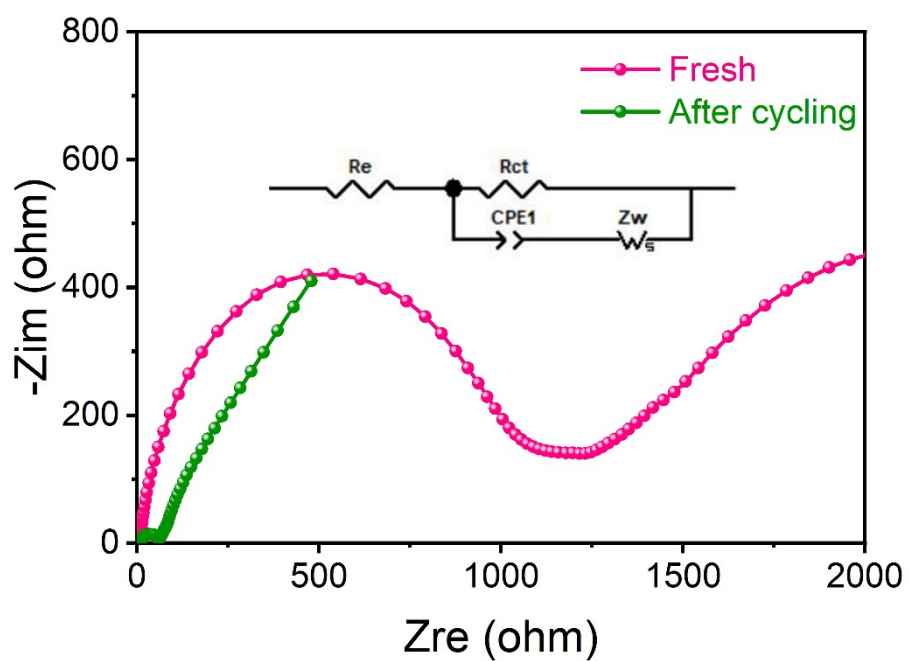

**Figure S12.** EIS spectra of the Se@THPC composite before and after cycling.

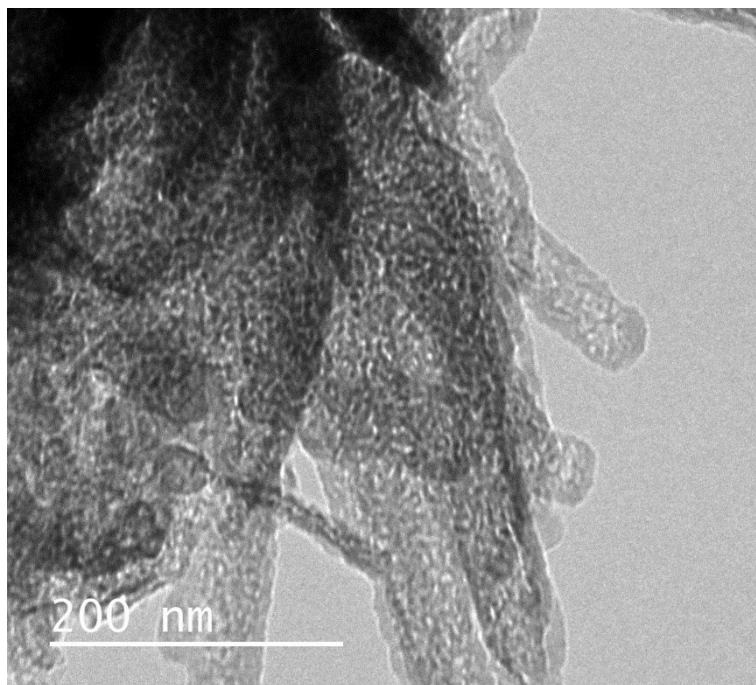

**Figure S13.** TEM image of the Se@THPC composite after cycling.

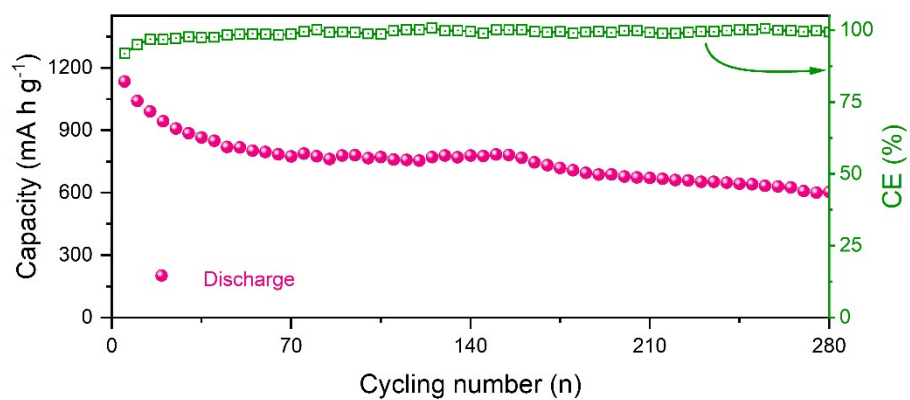

**Figure S15.** Cycling performance of the SeS<sub>2</sub>@THPC composite at 0.2 A g<sup>-1</sup>.



#### References involved in Figure 4d:

1. Xu, Q.; Liu, T.; Li, Y.; Hu, L.; Dai, C.; Zhang, Y.; Li, Y.; Liu, D.; Xu, M., Selenium Encapsulated into Metal–Organic Frameworks Derived N-Doped Porous Carbon Polyhedrons as Cathode for Na–Se Batteries. *ACS Applied Materials & Interfaces* 2017, 9 (47), 41339-41346.
2. Xu, Q.; Liu, H.; Du, W.; Zhan, R.; Hu, L.; Bao, S.; Dai, C.; Liu, F.; Xu, M., Metal-organic complex derived hierarchical porous carbon as host matrix for rechargeable Na-Se batteries. *Electrochimica Acta* 2018, 276, 21-27.
3. Xiao, F.; Yang, X.; Yao, T.; Wang, H.; Rogach, A. L., Encapsulation of selenium in MOF-derived N, O-codoped porous flower-like carbon host for Na-Se batteries. *Chemical Engineering Journal* 2022, 430, 132737.
4. Sun, W.; Guo, K.; Fan, J.; Min, Y.; Xu, Q., Confined Selenium in N-Doped Mesoporous Carbon Nanospheres for Sodium-Ion Batteries. *ACS Applied Materials & Interfaces* 2021, 13 (14), 16558-16566.
5. Ding, J., Zhou, H., Zhang, H., Tong, L., Mitlin, D., Selenium Impregnated Monolithic Carbons as Free-Standing Cathodes for High Volumetric Energy Lithium and Sodium Metal Batteries. *Adv. Energy Mater.* 2018, 8, 1701918.
6. Dong, W.; Chen, H.; Xia, F.; Yu, W.; Song, J.; Wu, S.; Deng, Z.; Hu, Z.-Y.; Hasan, T.; Li, Y.; Wang, H.; Chen, L.; Su, B.-L., Selenium clusters in Zn-glutamate MOF derived nitrogen-doped hierarchically radial-structured microporous carbon for advanced rechargeable Na–Se batteries. *Journal of Materials Chemistry A* 2018, 6 (45), 22790-22797.
